# Supplementary material for: A Proteomic Study of Hemocyte Proteins from Mud Crab (Scylla paramamosain) Infected with White Spot Syndrome Virus or Vibrio alginolyticus
Source: PubMed Central journal article supplement (PMC5406513; doi:10.3389/fimmu.2017.00468), 2017-04-27

A

### KEGG Pathway Classification

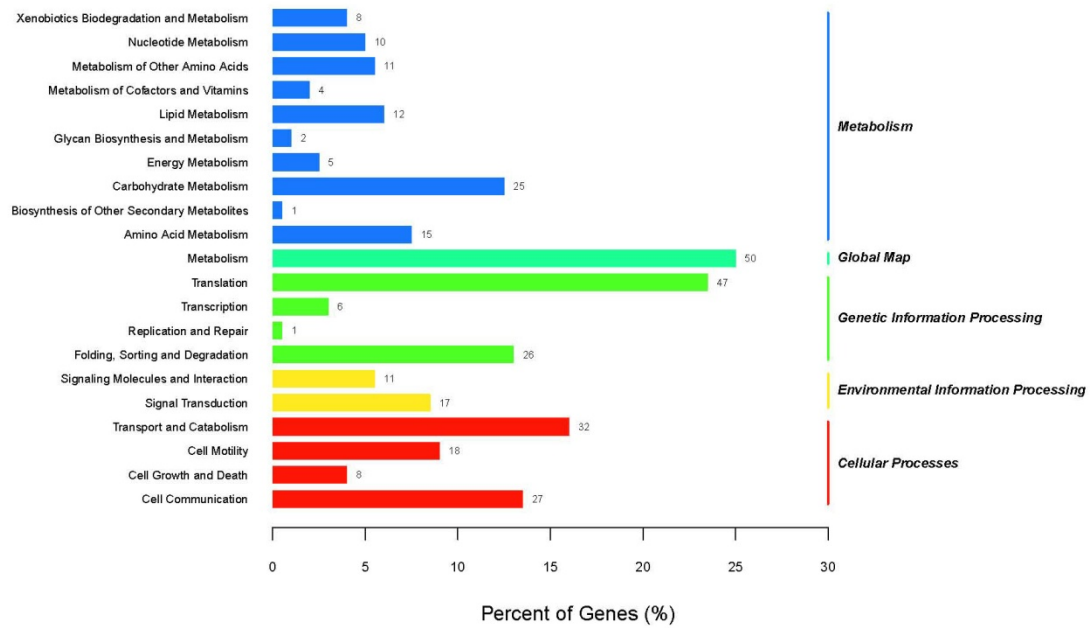

B

### KEGG Pathway Classification

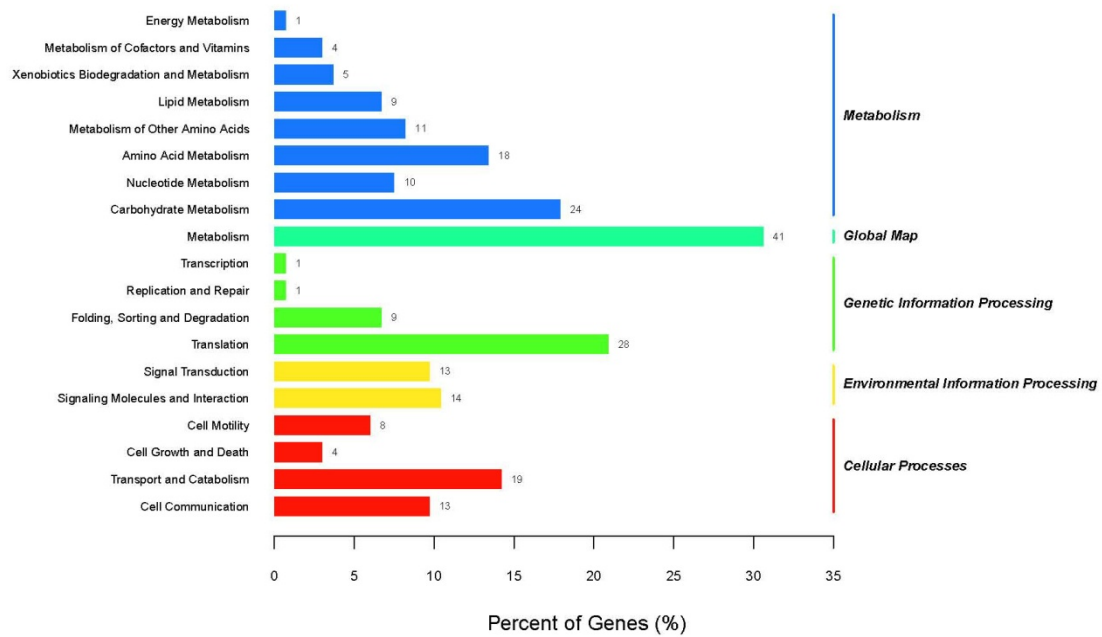

Supplement: image_1.pdf [file image_1.pdf]
